# Supplementary material for: Anti-inflammatory compounds moracin O and P from Morus alba Linn. (Sohakuhi) target the NF-κB pathway
Source: PubMed Central journal article supplement — Mol Med Rep. 2020 Oct 20;22(6):5385–91. doi: 10.3892/mmr.2020.11615 (PMC7647032; doi:10.3892/mmr.2020.11615), 2020-10-20
Supplement: Supplementary_Data.pdf [file Supplementary_Data.pdf]

Table SI. List of medicinal plant extract in the Institute of Natural Medicine University of Toyama natural product library.

| Japanese name    | Scientific name              | Common designation     | Link to Institute of Natural Medicine data base                                                                                                                                                                                                             |
|------------------|------------------------------|------------------------|-------------------------------------------------------------------------------------------------------------------------------------------------------------------------------------------------------------------------------------------------------------|
| Baimo            | Fritillariae bulbus          | Fritillaria bulb       | <a href="http://dentomed.u-toyama.ac.jp/en/scientific_information_on_crude_drugs/Fritillaria%20Bulb/SCC000064">http://dentomed.u-toyama.ac.jp/en/scientific_information_on_crude_drugs/Fritillaria%20Bulb/SCC000064</a>                                     |
| Bakumondo        | Ophiopogonis tuber           | Ophiopogon tuber       | <a href="http://dentomed.u-toyama.ac.jp/en/scientific_information_on_crude_drugs/Ophiopogon%20Tuber/SCC000065">http://dentomed.u-toyama.ac.jp/en/scientific_information_on_crude_drugs/Ophiopogon%20Tuber/SCC000065</a>                                     |
| Binroji          | Arecae semen                 | Areca                  | <a href="http://dentomed.u-toyama.ac.jp/en/scientific_information_on_crude_drugs/Areca/SCC000070">http://dentomed.u-toyama.ac.jp/en/scientific_information_on_crude_drugs/Areca/SCC000070</a>                                                               |
| Biwayo           | Eriobotryae folium           | Loquat leaf            | <a href="http://dentomed.u-toyama.ac.jp/en/scientific_information_on_crude_drugs/Loquat%20Leaf/SCC000110">http://dentomed.u-toyama.ac.jp/en/scientific_information_on_crude_drugs/Loquat%20Leaf/SCC000110</a>                                               |
| Bofu             | Saposhnikoviae radix         | Saposhnikovia root     | <a href="http://dentomed.u-toyama.ac.jp/en/scientific_information_on_crude_drugs/Saposhnikovia%20Root%20and%20Rhizome/SCC000074">http://dentomed.u-toyama.ac.jp/en/scientific_information_on_crude_drugs/Saposhnikovia%20Root%20and%20Rhizome/SCC000074</a> |
| Boi              | Sinomeni caulis et rhizoma   | Sinomenium stem        | <a href="http://dentomed.u-toyama.ac.jp/en/scientific_information_on_crude_drugs/Sinomenium%20Stem%20and%20Rhizome/SCC000073">http://dentomed.u-toyama.ac.jp/en/scientific_information_on_crude_drugs/Sinomenium%20Stem%20and%20Rhizome/SCC000073</a>       |
| Bokon            | Imperatae rhizoma            | Imperata rhizome       | <a href="http://dentomed.u-toyama.ac.jp/en/scientific_information_on_crude_drugs/Imperata%20Rhizome/SCC000111">http://dentomed.u-toyama.ac.jp/en/scientific_information_on_crude_drugs/Imperata%20Rhizome/SCC000111</a>                                     |
| Botampi          | Moutan cortex                | Moutan bark            | <a href="http://dentomed.u-toyama.ac.jp/en/scientific_information_on_crude_drugs/Moutan%20Bark/SCC000075">http://dentomed.u-toyama.ac.jp/en/scientific_information_on_crude_drugs/Moutan%20Bark/SCC000075</a>                                               |
| Bukuryo          | Poria                        | Poria sclerotium       | <a href="http://dentomed.u-toyama.ac.jp/en/scientific_information_on_crude_drugs/Poria%20Sclerotium/SCC000071">http://dentomed.u-toyama.ac.jp/en/scientific_information_on_crude_drugs/Poria%20Sclerotium/SCC000071</a>                                     |
| Byakujutsu       | Atractylodis rhizoma         | Atractylodes rhizome   | <a href="http://dentomed.u-toyama.ac.jp/en/scientific_information_on_crude_drugs/Atractylodes%20Rhizome/SCC000069">http://dentomed.u-toyama.ac.jp/en/scientific_information_on_crude_drugs/Atractylodes%20Rhizome/SCC000069</a>                             |
| Byakushi         | Angelicae dahuricae radix    | Angelica dahurica root | <a href="http://dentomed.u-toyama.ac.jp/en/scientific_information_on_crude_drugs/Angelica%20Dahurica%20Root/SCC000068">http://dentomed.u-toyama.ac.jp/en/scientific_information_on_crude_drugs/Angelica%20Dahurica%20Root/SCC000068</a>                     |
| Chikusetsuninjin | Panacis japonici rhizoma     | Panax rhizome          | <a href="http://dentomed.u-toyama.ac.jp/en/scientific_information_on_crude_drugs/Panax%20Japonicus%20Rhizome/SCC000053">http://dentomed.u-toyama.ac.jp/en/scientific_information_on_crude_drugs/Panax%20Japonicus%20Rhizome/SCC000053</a>                   |
| Chimo            | Anemarrhenae rhizoma         | Anemarrhena rhizome    | <a href="http://dentomed.u-toyama.ac.jp/en/scientific_information_on_crude_drugs/Anemarrhena%20Rhizome/SCC000054">http://dentomed.u-toyama.ac.jp/en/scientific_information_on_crude_drugs/Anemarrhena%20Rhizome/SCC000054</a>                               |
| Chimpi           | Aurantii nobilis pericarpium | Citrus unshiu peel     | <a href="http://dentomed.u-toyama.ac.jp/en/scientific_information_on_crude_drugs/Citrus%20Unshiu%20Peel/SCC000058">http://dentomed.u-toyama.ac.jp/en/scientific_information_on_crude_drugs/Citrus%20Unshiu%20Peel/SCC000058</a>                             |
| Choji            | Caryophylli flos             | Clove                  | <a href="http://dentomed.u-toyama.ac.jp/en/scientific_information_on_crude_drugs/Clove/SCC000055">http://dentomed.u-toyama.ac.jp/en/scientific_information_on_crude_drugs/Clove/SCC000055</a>                                                               |
| Chorei           | Polyporus                    | Polyporus sclerotium   | <a href="http://dentomed.u-toyama.ac.jp/en/scientific_information_on_crude_drugs/Polyporus%20Sclerotium/SCC000057">http://dentomed.u-toyama.ac.jp/en/scientific_information_on_crude_drugs/Polyporus%20Sclerotium/SCC000057</a>                             |
| Chotoko          | Uncariae uncis cum ramulus   | Uncaria hook           | <a href="http://dentomed.u-toyama.ac.jp/en/scientific_information_on_crude_drugs/Uncaria%20Hook/SCC000056">http://dentomed.u-toyama.ac.jp/en/scientific_information_on_crude_drugs/Uncaria%20Hook/SCC000056</a>                                             |
| Daio             | Rhei rhizoma                 | Rhubarb                | <a href="http://dentomed.u-toyama.ac.jp/en/scientific_information_on_crude_drugs/Rhubarb/SCC000050">http://dentomed.u-toyama.ac.jp/en/scientific_information_on_crude_drugs/Rhubarb/SCC000050</a>                                                           |
| Dokukatsu        | Araliae cordatae rhizoma     | Aralia root            | <a href="http://dentomed.u-toyama.ac.jp/en/scientific_information_on_crude_drugs/Araria%20Root/SCC000104">http://dentomed.u-toyama.ac.jp/en/scientific_information_on_crude_drugs/Araria%20Root/SCC000104</a>                                               |
| Engosaku         | Corydalis tuber              | Corydalis tuber        | <a href="http://dentomed.u-toyama.ac.jp/en/scientific_information_on_crude_drugs/Corydalis%20Tuber/SCC000003">http://dentomed.u-toyama.ac.jp/en/scientific_information_on_crude_drugs/Corydalis%20Tuber/SCC000003</a>                                       |
| Gaiyo            | Artemisiae folium            | Artemisia leaf         | <a href="http://dentomed.u-toyama.ac.jp/en/scientific_information_on_crude_drugs/Artemisia%20Leaf/SCC000083">http://dentomed.u-toyama.ac.jp/en/scientific_information_on_crude_drugs/Artemisia%20Leaf/SCC000083</a>                                         |
| Gajutsu          | Zedoariae rhizoma            | Zedoary                | <a href="http://dentomed.u-toyama.ac.jp/en/scientific_information_on_crude_drugs/Zedoary/SCC000009">http://dentomed.u-toyama.ac.jp/en/scientific_information_on_crude_drugs/Zedoary/SCC000009</a>                                                           |
| Goboshi          | Arctii fructus               | Burdock fruit          | <a href="http://dentomed.u-toyama.ac.jp/en/scientific_information_on_crude_drugs/Burdock%20Fruit/SCC000027">http://dentomed.u-toyama.ac.jp/en/scientific_information_on_crude_drugs/Burdock%20Fruit/SCC000027</a>                                           |
| Gokanhi          | Albizziae cortex             | Silktree albizia bark  | <a href="http://dentomed.u-toyama.ac.jp/en/scientific_information_on_crude_drugs/Silktree%20Albizia%20Bark/SCC000088">http://dentomed.u-toyama.ac.jp/en/scientific_information_on_crude_drugs/Silktree%20Albizia%20Bark/SCC000088</a>                       |
| Goma             | Sesami semen                 | Sesame                 | <a href="http://dentomed.u-toyama.ac.jp/en/scientific_information_on_crude_drugs/Sesame/SCC000091">http://dentomed.u-toyama.ac.jp/en/scientific_information_on_crude_drugs/Sesame/SCC000091</a>                                                             |
| Gomishi          | Schisandrae fructus          | Schisandra fruit       | <a href="http://dentomed.u-toyama.ac.jp/en/scientific_information_on_crude_drugs/Schisandra%20Fruit/SCC000028">http://dentomed.u-toyama.ac.jp/en/scientific_information_on_crude_drugs/Schisandra%20Fruit/SCC000028</a>                                     |
| Goshitsu         | Achyranthis radix            | Achyranthes root       | <a href="http://dentomed.u-toyama.ac.jp/en/scientific_information_on_crude_drugs/Achyranthes%20Root/SCC000025">http://dentomed.u-toyama.ac.jp/en/scientific_information_on_crude_drugs/Achyranthes%20Root/SCC000025</a>                                     |

Table SI. Continued.

| Japanese name | Scientific name                                  | Common designation                      | Link to Institute of Natural Medicine data base                                                                                                                                                                                                             |
|---------------|--------------------------------------------------|-----------------------------------------|-------------------------------------------------------------------------------------------------------------------------------------------------------------------------------------------------------------------------------------------------------------|
| Goshuyu       | Evodiae fructus                                  | Evodia fruit                            | <a href="http://dentomed.u-toyama.ac.jp/en/scientific_information_on_crude_drugs/Euodia%20Fruit/SCC000026">http://dentomed.u-toyama.ac.jp/en/scientific_information_on_crude_drugs/Euodia%20Fruit/SCC000026</a>                                             |
| Hakka         | Menthae herba                                    | Mentha herb                             | <a href="http://dentomed.u-toyama.ac.jp/en/scientific_information_on_crude_drugs/Mentha%20Herb/SCC000066">http://dentomed.u-toyama.ac.jp/en/scientific_information_on_crude_drugs/Mentha%20Herb/SCC000066</a>                                               |
| Hakusempi     | Dictamni radicis cortex                          | Densefruit pittany root-bark            | <a href="http://dentomed.u-toyama.ac.jp/en/scientific_information_on_crude_drugs/Densefruit%20Pittany%20Root-bark/SCC000108">http://dentomed.u-toyama.ac.jp/en/scientific_information_on_crude_drugs/Densefruit%20Pittany%20Root-bark/SCC000108</a>         |
| Hange         | Pinelliae tuber                                  | Pinellia tuber                          | <a href="http://dentomed.u-toyama.ac.jp/en/scientific_information_on_crude_drugs/Pinellia%20Tuber/SCC000067">http://dentomed.u-toyama.ac.jp/en/scientific_information_on_crude_drugs/Pinellia%20Tuber/SCC000067</a>                                         |
| Hobushi       | Aconiti tuber, radix aconiti lateralis preparata | Aconite, common monkshood daughter root | <a href="http://dentomed.u-toyama.ac.jp/en/scientific_information_on_crude_drugs/Saposhnikovia%20Root%20and%20Rhizome/SCC000074">http://dentomed.u-toyama.ac.jp/en/scientific_information_on_crude_drugs/Saposhnikovia%20Root%20and%20Rhizome/SCC000074</a> |
| Hokotsushi    | Psoraleae semen                                  | Malaytea scurfpea fruit                 | <a href="http://dentomed.u-toyama.ac.jp/en/scientific_information_on_crude_drugs/Malaytea%20Scurfpea%20Fruit/SCC000112">http://dentomed.u-toyama.ac.jp/en/scientific_information_on_crude_drugs/Malaytea%20Scurfpea%20Fruit/SCC000112</a>                   |
| Inchinko      | Artemisiae capillaris flor                       | Artemisia capillaris flower             | <a href="http://dentomed.u-toyama.ac.jp/en/scientific_information_on_crude_drugs/Artemisia%20Capillaris%20Flower/SCC000001">http://dentomed.u-toyama.ac.jp/en/scientific_information_on_crude_drugs/Artemisia%20Capillaris%20Flower/SCC000001</a>           |
| Jikoppi       | Lycii cortex                                     | Lycium bark                             | <a href="http://dentomed.u-toyama.ac.jp/en/scientific_information_on_crude_drugs/Lycium%20Bark/SCC000038">http://dentomed.u-toyama.ac.jp/en/scientific_information_on_crude_drugs/Lycium%20Bark/SCC000038</a>                                               |
| Jingyo        | Gentianae macrophyllae radix                     | Gentiana macrophylla root               | <a href="http://dentomed.u-toyama.ac.jp/en/scientific_information_on_crude_drugs/Gentiana%20Macrophylla%20Root/SCC000096">http://dentomed.u-toyama.ac.jp/en/scientific_information_on_crude_drugs/Gentiana%20Macrophylla%20Root/SCC000096</a>               |
| Jio           | Rehmanniae radix                                 | Rehmannia root                          | <a href="http://dentomed.u-toyama.ac.jp/en/scientific_information_on_crude_drugs/Rehmannia%20Root/SCC000036">http://dentomed.u-toyama.ac.jp/en/scientific_information_on_crude_drugs/Rehmannia%20Root/SCC000036</a>                                         |
| Jukujo        | Processi rehmanniae radix                        | Prepared rehmannia root                 | <a href="http://dentomed.u-toyama.ac.jp/en/scientific_information_on_crude_drugs/Processed%20Rehmannia%20Root/SCC000039">http://dentomed.u-toyama.ac.jp/en/scientific_information_on_crude_drugs/Processed%20Rehmannia%20Root/SCC000039</a>                 |
| Kakkon        | Puerariae radix                                  | Pueraria root                           | <a href="http://dentomed.u-toyama.ac.jp/en/scientific_information_on_crude_drugs/Pueraria%20Root/SCC000010">http://dentomed.u-toyama.ac.jp/en/scientific_information_on_crude_drugs/Pueraria%20Root/SCC000010</a>                                           |
| Kankyo        | Zingiberis processum rhizoma                     | Processed ginger                        | <a href="http://dentomed.u-toyama.ac.jp/en/scientific_information_on_crude_drugs/Processed%20Ginger/SCC000012">http://dentomed.u-toyama.ac.jp/en/scientific_information_on_crude_drugs/Processed%20Ginger/SCC000012</a>                                     |
| Kanzo         | Glycyrrhizae radix                               | Glycyrrhiza                             | <a href="http://dentomed.u-toyama.ac.jp/en/scientific_information_on_crude_drugs/Glycyrrhiza/SCC000013">http://dentomed.u-toyama.ac.jp/en/scientific_information_on_crude_drugs/Glycyrrhiza/SCC000013</a>                                                   |
| Karokon       | Trichosanthis radix                              | Trichosanthes root                      | <a href="http://dentomed.u-toyama.ac.jp/en/scientific_information_on_crude_drugs/Trichosanthes%20Root/SCC000011">http://dentomed.u-toyama.ac.jp/en/scientific_information_on_crude_drugs/Trichosanthes%20Root/SCC000011</a>                                 |
| Kashuu        | Polygoni multiflori radix                        | Polygonum root                          | <a href="http://dentomed.u-toyama.ac.jp/en/scientific_information_on_crude_drugs/Polygonum%20Root/SCC000084">http://dentomed.u-toyama.ac.jp/en/scientific_information_on_crude_drugs/Polygonum%20Root/SCC000084</a>                                         |
| Keigai        | Schizonepetae Sspica                             | Schizonepeta spike                      | <a href="http://dentomed.u-toyama.ac.jp/en/scientific_information_on_crude_drugs/Schizonepeta%20Spike/SCC000020">http://dentomed.u-toyama.ac.jp/en/scientific_information_on_crude_drugs/Schizonepeta%20Spike/SCC000020</a>                                 |
| Keihi         | Cinnamoni cortex                                 | Cinnamon bark                           | <a href="http://dentomed.u-toyama.ac.jp/en/scientific_information_on_crude_drugs/Cinnamon%20Bark/SCC000021">http://dentomed.u-toyama.ac.jp/en/scientific_information_on_crude_drugs/Cinnamon%20Bark/SCC000021</a>                                           |
| Keiketto      | Spatholobi caulis; mucunae caulis                | Suberect spatholobus stem               | <a href="http://dentomed.u-toyama.ac.jp/en/scientific_information_on_crude_drugs/Suberect%20Spatholobus%20Stem/SCC000086">http://dentomed.u-toyama.ac.jp/en/scientific_information_on_crude_drugs/Suberect%20Spatholobus%20Stem/SCC000086</a>               |
| Kijitsu       | Auranti fructus immaturus                        | Immature orange                         | <a href="http://dentomed.u-toyama.ac.jp/en/scientific_information_on_crude_drugs/Immature%20Orange/SCC000016">http://dentomed.u-toyama.ac.jp/en/scientific_information_on_crude_drugs/Immature%20Orange/SCC000016</a>                                       |
| Kikuka        | Chrysanthemi flos                                | Chrysanthemum flower                    | <a href="http://dentomed.u-toyama.ac.jp/en/scientific_information_on_crude_drugs/Chrysanthemum%20Flower/SCC000015">http://dentomed.u-toyama.ac.jp/en/scientific_information_on_crude_drugs/Chrysanthemum%20Flower/SCC000015</a>                             |
| Kikyo         | Platycodi radix                                  | Platycodon root                         | <a href="http://dentomed.u-toyama.ac.jp/en/scientific_information_on_crude_drugs/Platycodon%20Root/SCC000014">http://dentomed.u-toyama.ac.jp/en/scientific_information_on_crude_drugs/Platycodon%20Root/SCC000014</a>                                       |
| Koboku        | Magnoliae cortex                                 | Magnolia bark                           | <a href="http://dentomed.u-toyama.ac.jp/en/scientific_information_on_crude_drugs/Magnolia%20Bark/SCC000024">http://dentomed.u-toyama.ac.jp/en/scientific_information_on_crude_drugs/Magnolia%20Bark/SCC000024</a>                                           |
| Kobushi       | Cyperi rhizoma                                   | Cyperus rhizome                         | <a href="http://dentomed.u-toyama.ac.jp/en/scientific_information_on_crude_drugs/Cyprus%20Rhizome/SCC000023">http://dentomed.u-toyama.ac.jp/en/scientific_information_on_crude_drugs/Cyprus%20Rhizome/SCC000023</a>                                         |
| Kojin         | Ginseng radix rubra                              | Red ginseng                             | <a href="http://dentomed.u-toyama.ac.jp/en/scientific_information_on_crude_drugs/Red%20Ginseng/SCC000022">http://dentomed.u-toyama.ac.jp/en/scientific_information_on_crude_drugs/Red%20Ginseng/SCC000022</a>                                               |

Table SI. Continued.

| Japanese name   | Scientific name                       | Common designation      | Link to Institute of Natural Medicine data base                                                                                                                                                                                                   |
|-----------------|---------------------------------------|-------------------------|---------------------------------------------------------------------------------------------------------------------------------------------------------------------------------------------------------------------------------------------------|
| Koka            | Garthami flos                         | Safflower               | <a href="http://dentomed.u-toyama.ac.jp/en/scientific_information_on_crude_drugs/Safflower/SCC000087">http://dentomed.u-toyama.ac.jp/en/scientific_information_on_crude_drugs/Safflower/SCC000087</a>                                             |
| Kujin           | Sophorae radix                        | Sophora root            | <a href="http://dentomed.u-toyama.ac.jp/en/scientific_information_on_crude_drugs/Sophora%20Root/SCC000019">http://dentomed.u-toyama.ac.jp/en/scientific_information_on_crude_drugs/Sophora%20Root/SCC000019</a>                                   |
| Kumazasa        | Sasa folium                           | Sasa leaf               | <a href="http://dentomed.u-toyama.ac.jp/en/scientific_information_on_crude_drugs/Sasa%20Leaf/SCC000085">http://dentomed.u-toyama.ac.jp/en/scientific_information_on_crude_drugs/Sasa%20Leaf/SCC000085</a>                                         |
| Kyokatsu        | Notopterygii rhizoma                  | Notopterigum            | <a href="http://dentomed.u-toyama.ac.jp/en/scientific_information_on_crude_drugs/Notopterygium/SCC000017">http://dentomed.u-toyama.ac.jp/en/scientific_information_on_crude_drugs/Notopterygium/SCC000017</a>                                     |
| Kyonin          | Armeniaca semen                       | Apricot kernel          | <a href="http://dentomed.u-toyama.ac.jp/en/scientific_information_on_crude_drugs/Apricot%20Kernel/SCC000018">http://dentomed.u-toyama.ac.jp/en/scientific_information_on_crude_drugs/Apricot%20Kernel/SCC000018</a>                               |
| Mankeishi       | Vitidis fructus                       | Shrub chaste tree fruit | <a href="http://dentomed.u-toyama.ac.jp/en/scientific_information_on_crude_drugs/Shrub%20Chaste%20Tree%20Fruit/SCC000113">http://dentomed.u-toyama.ac.jp/en/scientific_information_on_crude_drugs/Shrub%20Chaste%20Tree%20Fruit/SCC000113</a>     |
| Mao             | Ephedrae herba                        | Ephedra herb            | <a href="http://dentomed.u-toyama.ac.jp/en/scientific_information_on_crude_drugs/Ephedra%20Herb/SCC000076">http://dentomed.u-toyama.ac.jp/en/scientific_information_on_crude_drugs/Ephedra%20Herb/SCC000076</a>                                   |
| Mashinin        | Cannabis fructus                      | Hemp fruit              | <a href="http://dentomed.u-toyama.ac.jp/en/scientific_information_on_crude_drugs/Hemp%20Fruit/SCC000077">http://dentomed.u-toyama.ac.jp/en/scientific_information_on_crude_drugs/Hemp%20Fruit/SCC000077</a>                                       |
| Mokko           | Saussureae radix                      | Saussurea root          | <a href="http://dentomed.u-toyama.ac.jp/en/scientific_information_on_crude_drugs/Saussurea%20Root/SCC000114">http://dentomed.u-toyama.ac.jp/en/scientific_information_on_crude_drugs/Saussurea%20Root/SCC000114</a>                               |
| Motsuyaku       | Myrrha                                | Myrrha                  | <a href="http://dentomed.u-toyama.ac.jp/en/scientific_information_on_crude_drugs/Myrrha/SCC000115">http://dentomed.u-toyama.ac.jp/en/scientific_information_on_crude_drugs/Myrrha/SCC000115</a>                                                   |
| Nikujuyo        | Cistanchis herba                      | Desertliving cistanche  | <a href="http://dentomed.u-toyama.ac.jp/en/scientific_information_on_crude_drugs/Desertliving%20Cistanche/SCC000107">http://dentomed.u-toyama.ac.jp/en/scientific_information_on_crude_drugs/Desertliving%20Cistanche/SCC000107</a>               |
| Ninjin          | Ginseng radix                         | Ginseng                 | <a href="http://dentomed.u-toyama.ac.jp/en/scientific_information_on_crude_drugs/Ginseng/SCC000063">http://dentomed.u-toyama.ac.jp/en/scientific_information_on_crude_drugs/Ginseng/SCC000063</a>                                                 |
| Obaku           | Phellodendri cortex                   | Phellodendron bark      | <a href="http://dentomed.u-toyama.ac.jp/en/scientific_information_on_crude_drugs/Phellodendron%20Bark/SCC000006">http://dentomed.u-toyama.ac.jp/en/scientific_information_on_crude_drugs/Phellodendron%20Bark/SCC000006</a>                       |
| Ogi             | Astragali radix                       | Astragalus root         | <a href="http://dentomed.u-toyama.ac.jp/en/scientific_information_on_crude_drugs/Astragalus%20Root/SCC000004">http://dentomed.u-toyama.ac.jp/en/scientific_information_on_crude_drugs/Astragalus%20Root/SCC000004</a>                             |
| Ogon            | Scutellariae radix                    | Scutellaria root        | <a href="http://dentomed.u-toyama.ac.jp/en/scientific_information_on_crude_drugs/Scutellaria%20Root/SCC000005">http://dentomed.u-toyama.ac.jp/en/scientific_information_on_crude_drugs/Scutellaria%20Root/SCC000005</a>                           |
| Onji            | Polygalae radix                       | Polygala root           | <a href="http://dentomed.u-toyama.ac.jp/en/scientific_information_on_crude_drugs/Polygala%20Root/SCC000008">http://dentomed.u-toyama.ac.jp/en/scientific_information_on_crude_drugs/Polygala%20Root/SCC000008</a>                                 |
| Oren            | Coptidis rhizoma                      | Coptis rhizome          | <a href="http://dentomed.u-toyama.ac.jp/en/scientific_information_on_crude_drugs/Coptis%20Rhizome/SCC000007">http://dentomed.u-toyama.ac.jp/en/scientific_information_on_crude_drugs/Coptis%20Rhizome/SCC000007</a>                               |
| Reishi          | Ganoderma                             | Ganoderma               | <a href="http://dentomed.u-toyama.ac.jp/en/scientific_information_on_crude_drugs/Ganoderma/SCC000120">http://dentomed.u-toyama.ac.jp/en/scientific_information_on_crude_drugs/Ganoderma/SCC000120</a>                                             |
| Rengyo          | Forsythiae fructus                    | Forsythia fruit         | <a href="http://dentomed.u-toyama.ac.jp/en/scientific_information_on_crude_drugs/Forsythia%20Fruit/SCC000080">http://dentomed.u-toyama.ac.jp/en/scientific_information_on_crude_drugs/Forsythia%20Fruit/SCC000080</a>                             |
| Ryokyo          | Alpiniae oofficinarum rhizoma rhizome | Alpinia officinarum     | <a href="http://dentomed.u-toyama.ac.jp/en/scientific_information_on_crude_drugs/Alpinia%20Officinarum%20Rhizome/SCC000119">http://dentomed.u-toyama.ac.jp/en/scientific_information_on_crude_drugs/Alpinia%20Officinarum%20Rhizome/SCC000119</a> |
| Ryutan          | Gentianae scabrae radix               | Japanese gentian        | <a href="http://dentomed.u-toyama.ac.jp/en/scientific_information_on_crude_drugs/Japanese%20Gentian/SCC000079">http://dentomed.u-toyama.ac.jp/en/scientific_information_on_crude_drugs/Japanese%20Gentian/SCC000079</a>                           |
| Safuran         | Crocus                                | Saffron                 | <a href="http://dentomed.u-toyama.ac.jp/en/scientific_information_on_crude_drugs/Saffron/SCC000031">http://dentomed.u-toyama.ac.jp/en/scientific_information_on_crude_drugs/Saffron/SCC000031</a>                                                 |
| Saiko           | Bupleuri radix                        | Bupleurum root          | <a href="http://dentomed.u-toyama.ac.jp/en/scientific_information_on_crude_drugs/Bupleurum%20Root/SCC000029">http://dentomed.u-toyama.ac.jp/en/scientific_information_on_crude_drugs/Bupleurum%20Root/SCC000029</a>                               |
| Saishin         | Asiasari radix                        | Asiasarum root          | <a href="http://dentomed.u-toyama.ac.jp/en/scientific_information_on_crude_drugs/Asiasarum%20Root/SCC000030">http://dentomed.u-toyama.ac.jp/en/scientific_information_on_crude_drugs/Asiasarum%20Root/SCC000030</a>                               |
| Sankirai        | Smilacis rhizoma                      | Smilax rhizome          | <a href="http://dentomed.u-toyama.ac.jp/en/scientific_information_on_crude_drugs/Smilax%20Rhizome/SCC000171">http://dentomed.u-toyama.ac.jp/en/scientific_information_on_crude_drugs/Smilax%20Rhizome/SCC000171</a>                               |
| Sanryo          | Sparganii rhizoma                     | Sparganium rhizome      | <a href="http://dentomed.u-toyama.ac.jp/en/scientific_information_on_crude_drugs/Sparganium%20Rhizome/SCC000093">http://dentomed.u-toyama.ac.jp/en/scientific_information_on_crude_drugs/Sparganium%20Rhizome/SCC000093</a>                       |
| Sanshichininjin | Notoginseng radix                     | Notoginseng root        | <a href="http://dentomed.u-toyama.ac.jp/en/scientific_information_on_crude_drugs/Notoginseng%20Root/SCC000092">http://dentomed.u-toyama.ac.jp/en/scientific_information_on_crude_drugs/Notoginseng%20Root/SCC000092</a>                           |
| Sanshishi       | Gardeniae fructus                     | Gardenia fruit          | <a href="http://dentomed.u-toyama.ac.jp/en/scientific_information_on_crude_drugs/Gardenia%20Fruit/SCC000032">http://dentomed.u-toyama.ac.jp/en/scientific_information_on_crude_drugs/Gardenia%20Fruit/SCC000032</a>                               |

Table SI. Continued.

| Japanese name | Scientific name                  | Common designation                 | Link to Institute of Natural Medicine data base                                                                                                                                                                                                                 |
|---------------|----------------------------------|------------------------------------|-----------------------------------------------------------------------------------------------------------------------------------------------------------------------------------------------------------------------------------------------------------------|
| Sansho        | Zanthoxyli fructus               | Zanthoxylum fruit                  | <a href="http://dentomed.u-toyama.ac.jp/en/scientific_information_on_crude_drugs/Zanthoxyrum%20Fruit/SCC000034">http://dentomed.u-toyama.ac.jp/en/scientific_information_on_crude_drugs/Zanthoxyrum%20Fruit/SCC000034</a>                                       |
| Sanshuyu      | Corni Fructus                    | Cornus fruit                       | <a href="http://dentomed.u-toyama.ac.jp/en/scientific_information_on_crude_drugs/Cornus%20Fruit/SCC000033">http://dentomed.u-toyama.ac.jp/en/scientific_information_on_crude_drugs/Cornus%20Fruit/SCC000033</a>                                                 |
| Sansonin      | Zizyphi spinosi semen            | Jujube / Zizyphus seed             | <a href="http://dentomed.u-toyama.ac.jp/en/scientific_information_on_crude_drugs/Jujube%20Seed/SCC000035">http://dentomed.u-toyama.ac.jp/en/scientific_information_on_crude_drugs/Jujube%20Seed/SCC000035</a>                                                   |
| Sekishaku     | Paeoniae radix rubra             | Red paeony root                    | <a href="http://dentomed.u-toyama.ac.jp/en/scientific_information_on_crude_drugs/Red%20Peony%20Root/SCC000045">http://dentomed.u-toyama.ac.jp/en/scientific_information_on_crude_drugs/Red%20Peony%20Root/SCC000045</a>                                         |
| Semburi       | Swertiae herba                   | Swertia herb                       | <a href="http://dentomed.u-toyama.ac.jp/en/scientific_information_on_crude_drugs/Swertia%20Herb/SCC000099">http://dentomed.u-toyama.ac.jp/en/scientific_information_on_crude_drugs/Swertia%20Herb/SCC000099</a>                                                 |
| Senkyu        | Cnidii rhizoma                   | Cnidium rhizome                    | <a href="http://dentomed.u-toyama.ac.jp/en/scientific_information_on_crude_drugs/Cnidium%20Rhizome/SCC000046">http://dentomed.u-toyama.ac.jp/en/scientific_information_on_crude_drugs/Cnidium%20Rhizome/SCC000046</a>                                           |
| Shakuyaku     | Paeoniae radix                   | Peony root                         | <a href="http://dentomed.u-toyama.ac.jp/en/scientific_information_on_crude_drugs/Peony%20Root/SCC000040">http://dentomed.u-toyama.ac.jp/en/scientific_information_on_crude_drugs/Peony%20Root/SCC000040</a>                                                     |
| Shazenshi     | Plantaginis semen                | Plantago seed                      | <a href="http://dentomed.u-toyama.ac.jp/en/scientific_information_on_crude_drugs/Plantago%20Seed/SCC000041">http://dentomed.u-toyama.ac.jp/en/scientific_information_on_crude_drugs/Plantago%20Seed/SCC000041</a>                                               |
| Shigoka       | Eleutherococci senticosi rhizoma | Eleutherococcus senticosus rhizome | <a href="http://dentomed.u-toyama.ac.jp/en/scientific_information_on_crude_drugs/Eleutherococcus%20Senticosus%20Rhizome/SCC000037">http://dentomed.u-toyama.ac.jp/en/scientific_information_on_crude_drugs/Eleutherococcus%20Senticosus%20Rhizome/SCC000037</a> |
| Shin'i        | Magnoliae flos                   | Magnolia flower                    | <a href="http://dentomed.u-toyama.ac.jp/en/scientific_information_on_crude_drugs/Magnolia%20Flower/SCC000044">http://dentomed.u-toyama.ac.jp/en/scientific_information_on_crude_drugs/Magnolia%20Flower/SCC000044</a>                                           |
| Shitsurishi   | Tribuli fructus                  | Tribulus fruit                     | <a href="http://dentomed.u-toyama.ac.jp/en/scientific_information_on_crude_drugs/Tribulus%20Fruit/SCC000094">http://dentomed.u-toyama.ac.jp/en/scientific_information_on_crude_drugs/Tribulus%20Fruit/SCC000094</a>                                             |
| Shokyo        | Zingiberis rhizoma               | Ginger                             | <a href="http://dentomed.u-toyama.ac.jp/en/scientific_information_on_crude_drugs/Ginger/SCC000042">http://dentomed.u-toyama.ac.jp/en/scientific_information_on_crude_drugs/Ginger/SCC000042</a>                                                                 |
| Shoma         | Cimicifugae rhizoma              | Cimicifuga rhizome                 | <a href="http://dentomed.u-toyama.ac.jp/en/scientific_information_on_crude_drugs/Cimicifuga%20Rhizome/SCC000043">http://dentomed.u-toyama.ac.jp/en/scientific_information_on_crude_drugs/Cimicifuga%20Rhizome/SCC000043</a>                                     |
| Sohakuhi      | Mori cortex                      | Mulberry bark                      | <a href="http://dentomed.u-toyama.ac.jp/en/scientific_information_on_crude_drugs/Mulberry%20Bark/SCC000048">http://dentomed.u-toyama.ac.jp/en/scientific_information_on_crude_drugs/Mulberry%20Bark/SCC000048</a>                                               |
| Sojutsu       | Atractylodis lanceae rhizoma     | Atractylodes lancea rhizome        | <a href="http://dentomed.u-toyama.ac.jp/en/scientific_information_on_crude_drugs/Atractylodes%20Lancea%20Rhizome/SCC000047">http://dentomed.u-toyama.ac.jp/en/scientific_information_on_crude_drugs/Atractylodes%20Lancea%20Rhizome/SCC000047</a>               |
| Souyo         | Mori folium                      | Mulberry leaf                      | <a href="http://dentomed.u-toyama.ac.jp/en/scientific_information_on_crude_drugs/Mulberry%20Leaf/SCC000100">http://dentomed.u-toyama.ac.jp/en/scientific_information_on_crude_drugs/Mulberry%20Leaf/SCC000100</a>                                               |
| Soyo          | Perillae herba                   | Perilla herb                       | <a href="http://dentomed.u-toyama.ac.jp/en/scientific_information_on_crude_drugs/Perilla%20Herb/SCC000049">http://dentomed.u-toyama.ac.jp/en/scientific_information_on_crude_drugs/Perilla%20Herb/SCC000049</a>                                                 |
| Taiso         | Zizyphi fructus                  | Jujube                             | <a href="http://dentomed.u-toyama.ac.jp/en/scientific_information_on_crude_drugs/Jujube/SCC000051">http://dentomed.u-toyama.ac.jp/en/scientific_information_on_crude_drugs/Jujube/SCC000051</a>                                                                 |
| Takusha       | Alismatis rhizoma                | Alisma rhizome                     | <a href="http://dentomed.u-toyama.ac.jp/en/scientific_information_on_crude_drugs/Alisma%20Rhizome/SCC000052">http://dentomed.u-toyama.ac.jp/en/scientific_information_on_crude_drugs/Alisma%20Rhizome/SCC000052</a>                                             |
| Tanjin        | Salviae miltiorhizae radix       | Danshen root                       | <a href="http://dentomed.u-toyama.ac.jp/en/scientific_information_on_crude_drugs/Danshen%20Root/SCC000102">http://dentomed.u-toyama.ac.jp/en/scientific_information_on_crude_drugs/Danshen%20Root/SCC000102</a>                                                 |
| Temma         | Gastrodiae tuber                 | Gastrodia tuber                    | <a href="http://dentomed.u-toyama.ac.jp/en/scientific_information_on_crude_drugs/Gastrodia%20Tuber/SCC000059">http://dentomed.u-toyama.ac.jp/en/scientific_information_on_crude_drugs/Gastrodia%20Tuber/SCC000059</a>                                           |
| Temmondo      | Asparagi tuber                   | Asparagus tuber                    | <a href="http://dentomed.u-toyama.ac.jp/en/scientific_information_on_crude_drugs/Asparagus%20Tuber/SCC000060">http://dentomed.u-toyama.ac.jp/en/scientific_information_on_crude_drugs/Asparagus%20Tuber/SCC000060</a>                                           |
| Tochu         | Eucommiae cortex                 | Eucommia bark                      | <a href="http://dentomed.u-toyama.ac.jp/en/scientific_information_on_crude_drugs/Eucommia%20Bark/SCC000105">http://dentomed.u-toyama.ac.jp/en/scientific_information_on_crude_drugs/Eucommia%20Bark/SCC000105</a>                                               |
| Tojin         | Codonopsis radix                 | Codonopsis root                    | <a href="http://dentomed.u-toyama.ac.jp/en/scientific_information_on_crude_drugs/Codonopsis%20Root/SCC000103">http://dentomed.u-toyama.ac.jp/en/scientific_information_on_crude_drugs/Codonopsis%20Root/SCC000103</a>                                           |
| Toki          | Angelicae radix                  | Japanese angelica root             | <a href="http://dentomed.u-toyama.ac.jp/en/scientific_information_on_crude_drugs/Japanese%20Angelica%20Root/SCC000061">http://dentomed.u-toyama.ac.jp/en/scientific_information_on_crude_drugs/Japanese%20Angelica%20Root/SCC000061</a>                         |
| Tonin         | Persicae semen                   | Peach kernel                       | <a href="http://dentomed.u-toyama.ac.jp/en/scientific_information_on_crude_drugs/Peach%20Kernel/SCC000062">http://dentomed.u-toyama.ac.jp/en/scientific_information_on_crude_drugs/Peach%20Kernel/SCC000062</a>                                                 |
| Ukon          | Curcumae rhizoma                 | Turmeric                           | <a href="http://dentomed.u-toyama.ac.jp/en/scientific_information_on_crude_drugs/Turmeric/SCC000002">http://dentomed.u-toyama.ac.jp/en/scientific_information_on_crude_drugs/Turmeric/SCC000002</a>                                                             |

Table SI. Continued.

| Japanese name | Scientific name         | Common designation    | Link to Institute of Natural Medicine data base                                                                                                                                                                                       |
|---------------|-------------------------|-----------------------|---------------------------------------------------------------------------------------------------------------------------------------------------------------------------------------------------------------------------------------|
| Uyaku         | <i>Linderae radix</i>   | Lindera root          | <a href="http://dentomed.u-toyama.ac.jp/en/scientific_information_on_crude_drugs/Lindera%20Root/SCC000082">http://dentomed.u-toyama.ac.jp/en/scientific_information_on_crude_drugs/Lindera%20Root/SCC000082</a>                       |
| Yakuchi       | <i>Alpiniae fructus</i> | Bitter cardamon       | <a href="http://dentomed.u-toyama.ac.jp/en/scientific_information_on_crude_drugs/Bitter%20Cardamon/SCC000116">http://dentomed.u-toyama.ac.jp/en/scientific_information_on_crude_drugs/Bitter%20Cardamon/SCC000116</a>                 |
| Yakumoso      | <i>Leonuri herba</i>    | Leonurus herb         | <a href="http://dentomed.u-toyama.ac.jp/en/scientific_information_on_crude_drugs/Leonurus%20Herb/SCC000117">http://dentomed.u-toyama.ac.jp/en/scientific_information_on_crude_drugs/Leonurus%20Herb/SCC000117</a>                     |
| Yokuinin      | <i>Coicis semen</i>     | Coix seed             | <a href="http://dentomed.u-toyama.ac.jp/en/scientific_information_on_crude_drugs/Coix%20Seed/SCC000078">http://dentomed.u-toyama.ac.jp/en/scientific_information_on_crude_drugs/Coix%20Seed/SCC000078</a>                             |
| Zokudan       | <i>Dipsaci radix</i>    | Himalayan teasel root | <a href="http://dentomed.u-toyama.ac.jp/en/scientific_information_on_crude_drugs/Himalayan%20Teasel%20Root/SCC000101">http://dentomed.u-toyama.ac.jp/en/scientific_information_on_crude_drugs/Himalayan%20Teasel%20Root/SCC000101</a> |
